# Supplementary material for: Rheological properties of porcine organs: measurements and fractional viscoelastic model
Source: Front Bioeng Biotechnol. 2024 Aug 1;12:1386955. doi: 10.3389/fbioe.2024.1386955 (PMC11324450; doi:10.3389/fbioe.2024.1386955)
Supplement: Supplementary file 1 [file Table1.XLSX]

## Sheet: Heart
											Axial Strain (%)	α	η
Heart											0.5	0.1283	0.0103
		Parameters	0.1 N (Contact Force)	10% axial strain							2.5	0.1125	0.018425
		Kα	2±0.64 kPa.(s)α	3.9±1.6 kPa.(s)α							4.5	0.11265	0.017625
		α	0.13±0.01	0.1±0.02							6.5	0.10775	0.02115
		η	10.3±6 Pa.s	25.6±9 Pa.s							8.5	0.106625	0.02055
											10.5	0.1021	0.02555
Pre-compression data (from Rheometer)
		Frequency (Hz)	0.1	0.151433	0.229299	0.347134	0.525478	0.794586	1.20223	1.81529	2.75478	4.17197	6.30573	9.53822		Semi-fractional KV model Fit data (MATLAB)
	Storage Modulus (kPa)															Storage Modulus (kPa)
		0.5% strain	1.35118	1.4995	1.61015	1.7168	1.82012	1.9224	2.02585	2.13365	2.24185	2.3486	2.4656	2.53115		0.5% strain	1.45079	1.52964	1.61276	1.70036	1.79269	1.88978	1.99228	2.09978	2.21451	2.3349	2.46121	2.59462
		2% strain	1.70593	1.88085	1.9964	2.1001	2.20377	2.31058	2.42178	2.53945	2.65475	2.76758	2.88538	2.94123		2% strain	1.80437	1.89134	1.98249	2.07798	2.17805	2.28266	2.39245	2.50695	2.62842	2.75514	2.88731	3.0261
		4% strain	1.9901	2.1889	2.3149	2.42592	2.5378	2.65485	2.77745	2.90837	3.0404	3.17523	3.32677	3.45408		4% strain	2.09006	2.18953	2.29372	2.40281	2.51706	2.63643	2.76164	2.89214	3.03051	3.17477	3.32516	3.48298
		6% strain	2.26675	2.49797	2.6361	2.7563	2.87702	3.00237	3.1353	3.2774	3.4202	3.56435	3.72485	3.8418		6% strain	2.38475	2.49361	2.60741	2.72635	2.85069	2.98034	3.1161	3.25733	3.40679	3.56234	3.72419	3.89372
		8% strain	2.57975	2.8351	2.9866	3.11605	3.24688	3.38372	3.5291	3.68535	3.84603	4.01205	4.18997	4.3778		8% strain	2.70195	2.82376	2.95104	3.08399	3.2229	3.36768	3.51919	3.67672	3.84335	4.01665	4.19689	4.38558
		10% strain	2.94905	3.22798	3.38857	3.52725	3.66775	3.8162	3.97425	4.14358	4.3178	4.4936	4.66983	4.85095		10% strain	3.07529	3.2079	3.3462	3.49038	3.64075	3.79718	3.96057	4.13013	4.30915	4.495	4.68792	4.8895
		Frequency (Hz)	0.1	0.151433	0.229299	0.347134	0.525478	0.794586	1.20223	1.81529	2.75478	4.17197	6.30573	9.53822
	Loss Modulus (kPa)															Loss Modulus (kPa)
		0.5% strain	0.314172	0.313275	0.321487	0.335647	0.353938	0.376082	0.402767	0.43457	0.47288	0.519335	0.568825	0.62981		0.5% strain	0.295644	0.312188	0.329872	0.348876	0.369468	0.391961	0.416984	0.445144	0.478141	0.517219	0.564897	0.625358
		2% strain	0.332235	0.349213	0.360113	0.377962	0.39956	0.425295	0.455732	0.491792	0.534587	0.585767	0.64079	0.709052		2% strain	0.326831	0.343447	0.361304	0.380683	0.402007	0.425827	0.453146	0.485112	0.524375	0.573424	0.636717	0.721532
		4% strain	0.367267	0.38766	0.399297	0.41906	0.446858	0.472235	0.505622	0.545153	0.592252	0.648458	0.708355	0.782888		4% strain	0.373474	0.392076	0.411985	0.433474	0.456954	0.482951	0.512444	0.546516	0.587773	0.638544	0.703104	0.788456
		6% strain	0.404927	0.429937	0.441285	0.462415	0.48846	0.519278	0.555615	0.59836	0.648868	0.708842	0.779838	0.852515		6% strain	0.408936	0.428599	0.449665	0.472457	0.497454	0.525286	0.557099	0.594207	0.639651	0.696274	0.769186	0.866736
		8% strain	0.449715	0.475687	0.486573	0.509153	0.537342	0.570527	0.609683	0.655823	0.710175	0.774342	0.846877	0.927798		8% strain	0.45732	0.478908	0.501964	0.526801	0.553894	0.583852	0.617808	0.657026	0.704526	0.76303	0.837518	0.936147
		10% strain	0.50456	0.529927	0.539597	0.56329	0.59312	0.62882	0.670925	0.720525	0.77897	0.848287	0.92674	1.01258		10% strain	0.498222	0.520909	0.545188	0.571438	0.600231	0.632318	0.669067	0.712059	0.764915	0.831076	0.916683	1.03176

## Sheet: Kidney
													Axial Strain (%)	α	η
Kidney													0.5	0.12128	0.00758
		Parameters	0.1 N (Contact Force)	10% axial strain									2.5	0.11044	0.01086
		Kα	0.88±0.25 kPa.(s)α	2.5±0.74 kPa.(s)α									4.5	0.10386	0.01354
		α	0.12±0.01	0.09±0.01									6.5	0.10054	0.01428
		η	7.58±3 Pa.s	22±8 Pa.s									8.5	0.09152	0.02012
													10.5	0.0878	0.02214
Pre-compression data (from Rheometer)
		Frequency (Hz)		0.1	0.151433	0.229299	0.347134	0.525478	0.794586	1.20223	1.81529	2.75478	4.17197	6.30573	9.53822			Semi-fractional KV model data (MATLAB)
	Storage Modulus (kPa)																	Storage Modulus (kPa)
		0.5% strain		0.643738	0.685598	0.722732	0.762866	0.800914	0.840172	0.881946	0.925894	0.971758	1.01818	1.09061	1.15116			0.5% strain	0.652684	0.686499	0.722059	0.759441	0.798751	0.839985	0.883411	0.928852	0.977227	1.02787	1.08087	1.13671
		2% strain		0.822996	0.860954	0.899868	0.940404	0.981404	1.02528	1.07223	1.12177	1.17327	1.22553	1.30149	1.36242			2% strain	0.819576	0.857759	0.897713	0.939507	0.983237	1.02888	1.07671	1.12652	1.17928	1.23423	1.29146	1.35146
		4% strain		1.02907	1.0676	1.11064	1.15684	1.20469	1.25501	1.30897	1.36639	1.42472	1.4839	1.56446	1.62928			4% strain	1.01855	1.06274	1.10885	1.15693	1.20708	1.25927	1.31379	1.37039	1.43017	1.49224	1.55668	1.62404
		6% strain		1.27871	1.32101	1.3704	1.42325	1.47842	1.53637	1.59907	1.66736	1.73636	1.81016	1.91042	2.0123			6% strain	1.25895	1.31197	1.36721	1.42474	1.48469	1.54699	1.612	1.67941	1.7505	1.82424	1.9007	1.98053
		8% strain		1.6216	1.65928	1.71429	1.77458	1.83824	1.90528	1.9776	2.0564	2.13286	2.21006	2.2971	2.37418			8% strain	1.58852	1.64855	1.71083	1.77544	1.84246	1.91184	1.98393	2.05836	2.13655	2.2173	2.30069	2.38739
		10% strain		2.05168	2.09032	2.15378	2.22176	2.29526	2.37266	2.45736	2.5498	2.64192	2.73874	2.8375	2.96888			10% strain	1.9993	2.07159	2.14647	2.22402	2.30436	2.38737	2.47351	2.5623	2.65542	2.75145	2.85047	2.95324
		Frequency (Hz)		0.1	0.151433	0.229299	0.347134	0.525478	0.794586	1.20223	1.81529	2.75478	4.17197	6.30573	9.53822			Frequency (Hz)	0.1	0.151433	0.229299	0.347134	0.525478	0.794586	1.20223	1.81529	2.75478	4.17197	6.30573	9.53822
	Loss Modulus (kPa)																	Loss Modulus (kPa)
		0.5% strain		0.127626	0.129205	0.134366	0.140408	0.149272	0.160446	0.17404	0.190436	0.21031	0.234312	0.259784	0.292862			0.5% strain	0.127102	0.13404	0.141518	0.149654	0.158625	0.168661	0.180179	0.193656	0.210193	0.230816	0.257367	0.292857
		2% strain		0.143296	0.146234	0.151982	0.16065	0.170758	0.183782	0.199428	0.218272	0.240882	0.268202	0.29732	0.334572			2% strain	0.143788	0.151002	0.158815	0.16739	0.176968	0.187879	0.200698	0.216122	0.235658	0.260838	0.294309	0.340367
		4% strain		0.171366	0.17217	0.178424	0.18742	0.199202	0.213766	0.231508	0.252818	0.278306	0.309048	0.34218	0.38473			4% strain	0.166566	0.17444	0.182986	0.192401	0.202982	0.21514	0.229577	0.24717	0.269757	0.299272	0.339007	0.394292
		6% strain		0.205838	0.204454	0.210434	0.22022	0.233128	0.249322	0.269216	0.29308	0.321592	0.356128	0.393206	0.441344			6% strain	0.199629	0.208713	0.218525	0.229272	0.241265	0.254929	0.271005	0.290401	0.315056	0.346972	0.389586	0.448472
		8% strain		0.25211	0.245798	0.251668	0.261916	0.276068	0.294038	0.31639	0.343236	0.375374	0.414058	0.456988	0.510304			8% strain	0.226538	0.236065	0.246448	0.257969	0.271061	0.286326	0.304787	0.327746	0.35786	0.398029	0.453112	0.530956
		10% strain		0.30836	0.298692	0.302172	0.312456	0.327648	0.347486	0.37217	0.402208	0.438058	0.481362	0.532406	0.588786			10% strain	0.272647	0.283567	0.295427	0.308536	0.323367	0.340578	0.361291	0.38693	0.420412	0.464907	0.525736	0.611499

## Sheet: Liver
Liver													Axial Strain (%)	α	η
													0.5	0.159925	0.009725
		Parameters	0.1 N (Contact Force)	10% axial strain									2.5	0.14385	0.01305
		Kα	0.27±0.06 kPa.(s)α	0.6±0.12 kPa.(s)α									4.5	0.13965	0.01335
		α	0.16±0.02	0.13±0.01									6.5	0.130425	0.0161
		η	9.7±1.8 Pa.s	17.5±4.5 Pa.s									8.5	0.1324	0.014625
													10.5	0.125975	0.0175
Pre-compression data (from Rheometer)
		Frequency (Hz)	0.1	0.151433	0.229299	0.347134	0.525478	0.794586	1.20223	1.81529	2.75478	4.17197		Semi-fractional KV model Fit data (MATLAB)
	Storage Modulus (kPa)													Storage Modulus (kPa)
		0.5% strain	0.180565	0.195508	0.209643	0.22424	0.2397	0.25625	0.274195	0.293413	0.31365	0.332783		0.5% strain	0.183124	0.195802	0.209355	0.223839	0.239322	0.25583	0.273504	0.292303	0.312647	0.334296
		2% strain	0.238537	0.25421	0.269215	0.284828	0.301707	0.320287	0.340615	0.36174	0.383748	0.403633		2% strain	0.237981	0.25263	0.268177	0.284672	0.302179	0.320712	0.340411	0.361213	0.383565	0.407179
		4% strain	0.28962	0.308265	0.325335	0.343005	0.362305	0.383373	0.407068	0.432038	0.460023	0.48925		4% strain	0.288459	0.305753	0.32408	0.343496	0.364071	0.385819	0.408901	0.433239	0.45935	0.486895
		6% strain	0.341025	0.361357	0.380182	0.399863	0.421103	0.443953	0.46973	0.49638	0.524668	0.550883		6% strain	0.339379	0.358392	0.378466	0.399653	0.422022	0.445579	0.470488	0.496656	0.524626	0.554023
		8% strain	0.389407	0.408992	0.428727	0.450005	0.4731	0.498672	0.527548	0.559388	0.59664	0.640567		8% strain	0.383287	0.40501	0.427959	0.452195	0.477799	0.504781	0.533328	0.563336	0.59543	0.629183
		10% strain	0.43849	0.457707	0.479077	0.50209	0.527	0.554087	0.584708	0.617545	0.65411	0.693663		10% strain	0.430645	0.45375	0.478088	0.503719	0.530718	0.559089	0.58902	0.620394	0.653853	0.688939
		Frequency (Hz)	0.1	0.151433	0.229299	0.347134	0.525478	0.794586	1.20223	1.81529	2.75478	4.17197
	Loss Modulus (kPa)													Loss Modulus (kPa)
		0.5% strain	0.0504088	0.0515615	0.0550337	0.059702	0.0657275	0.0732535	0.0826458	0.0945298	0.108715	0.126947		0.5% strain	0.048401	0.0521878	0.05646	0.0613645	0.0671202	0.0740304	0.0825988	0.0934698	0.107937	0.127421
		2% strain	0.0588273	0.0608563	0.0646333	0.0701767	0.0770297	0.0855857	0.0961645	0.10946	0.125477	0.145732		2% strain	0.0560612	0.0601073	0.0647075	0.0700514	0.0764235	0.0842249	0.094116	0.106962	0.124455	0.14852
		4% strain	0.0678955	0.0701762	0.0742613	0.0801825	0.0877453	0.0971822	0.108864	0.12354	0.141238	0.163282		4% strain	0.0659692	0.0705346	0.0756865	0.0816191	0.0886242	0.0971115	0.107758	0.121446	0.139916	0.165123
		6% strain	0.0759853	0.0786447	0.0830962	0.089537	0.0977978	0.108229	0.120928	0.136783	0.156008	0.179817		6% strain	0.0726609	0.0774759	0.0829424	0.0892912	0.0968701	0.106172	0.118007	0.133442	0.154557	0.18373
		8% strain	0.0847627	0.0865223	0.0909595	0.0977683	0.10646	0.117372	0.131022	0.147935	0.168148	0.193295		8% strain	0.0826293	0.0879837	0.0939855	0.100846	0.108885	0.118546	0.130571	0.14592	0.166499	0.194437
		10% strain	0.0924908	0.0943432	0.0989663	0.106124	0.115422	0.127167	0.141487	0.15946	0.18114	0.20763		10% strain	0.0880714	0.0936034	0.0998458	0.107047	0.115583	0.125984	0.139123	0.15615	0.179313	0.21117

## Sheet: Brain
Brain												Axial Strain (%)	α	η
												0.5	0.158275	0.010525
		Parameters	0.1 N (Contact Force)	10% axial strain								2.5	0.14875	0.0132
		Kα	0.25±0.03 kPa.(s)α	0.34±0.04 kPa.(s)α								4.5	0.1495	0.012975
		α	0.16±0.01	0.15±0.01								6.5	0.1492	0.013225
		η	10.5±2.5 Pa.s	12.3±2.8 Pa.s								8.5	0.152	0.012375
												10.5	0.15235	0.012325
Pre-compression data (from Rheometer)
		Frequency (Hz)	0.1	0.151433	0.229299	0.347134	0.525478	0.794586	1.20223	1.81529	2.75478			Semi-fractional KV model Fit data (MATLAB)
	Storage Modulus (kPa)													Storage Modulus (kPa)
		0.1 N	0.164902	0.179445	0.192983	0.20651	0.220333	0.235093	0.250642	0.266215	0.281087				0.1 N	0.168323	0.179744	0.191936	0.20495	0.218842	0.233636	0.249454	0.266257	0.284418
		2% strain	0.181862	0.19707	0.210767	0.22448	0.238638	0.253827	0.26962	0.28475	0.29753				2% strain	0.184961	0.196771	0.209333	0.222691	0.236897	0.251969	0.268024	0.285015	0.303311
		4% strain	0.193815	0.21054	0.22519	0.239628	0.254655	0.27075	0.287813	0.304773	0.320362				4% strain	0.19741	0.21009	0.223581	0.237931	0.253199	0.269403	0.28667	0.30495	0.32464
		6% strain	0.205025	0.223997	0.23976	0.254983	0.270755	0.287648	0.305683	0.32359	0.340187				6% strain	0.209845	0.223299	0.237611	0.252833	0.269027	0.286212	0.304522	0.323904	0.344779
		8% strain	0.214545	0.235253	0.252073	0.26816	0.284885	0.30287	0.32249	0.343017	0.364228				8% strain	0.220402	0.234784	0.250102	0.266411	0.283779	0.30223	0.32191	0.342764	0.365249
		10% strain	0.22737	0.250075	0.267912	0.284875	0.30233	0.32128	0.342195	0.364087	0.387587				10% strain	0.234055	0.249326	0.26559	0.282906	0.301347	0.320938	0.341833	0.363975	0.387848
		Frequency (Hz)	0.1	0.151433	0.229299	0.347134	0.525478	0.794586	1.20223	1.81529	2.75478
	Loss Modulus (kPa)													Loss Modulus (kPa)
		0.1 N	0.0463985	0.0480897	0.0509435	0.0551762	0.0606303	0.0675277	0.0761467	0.0870383	0.10092				0.1 N	0.0437628	0.0472025	0.0511164	0.0556597	0.0610635	0.0676523	0.0759602	0.0866819	0.101187
		2% strain	0.0477343	0.0503837	0.053666	0.0583712	0.064302	0.0717415	0.0809013	0.092499	0.107168				2% strain	0.0454677	0.0489655	0.0529914	0.0577344	0.0634787	0.0706272	0.0798383	0.0919833	0.108747
		4% strain	0.0508875	0.0535452	0.056803	0.0616613	0.067843	0.0756775	0.0852762	0.0973597	0.112653				4% strain	0.0486985	0.0524116	0.056663	0.0616403	0.0676246	0.0750134	0.0844582	0.0968165	0.113757
		6% strain	0.054194	0.0568293	0.0601	0.0651173	0.0715825	0.0797035	0.0897315	0.102357	0.11823				6% strain	0.0516201	0.0555286	0.0599947	0.0652106	0.0714646	0.0791637	0.0889758	0.101778	0.119282
		8% strain	0.055731	0.0590085	0.0625042	0.0677852	0.074564	0.0830758	0.0935582	0.10684	0.123328				8% strain	0.0550076	0.0591533	0.0638545	0.0692924	0.0757383	0.0835724	0.0934219	0.106102	0.123222
		10% strain	0.059424	0.062612	0.06599	0.07138	0.078372	0.0872177	0.0981345	0.111932	0.129075				10% strain	0.0583264	0.0626864	0.067615	0.0732936	0.0799939	0.088095	0.0982248	0.111195	0.128618

## Sheet: Strain Sweep
	Strain (%)	0.01	0.0133	0.0178	0.0237	0.0316	0.0422	0.0562	0.075	0.1	0.133	0.178	0.237	0.316	0.422	0.562	0.75	1	1.33	1.78	2.37	3.16	4.22	5.62	7.5	10
Heart	Storage Modulus (kPa)	1.65843	1.70005	1.73843	1.76655	1.79305	1.81675	1.8372	1.85457	1.86788	1.87705	1.88125	1.88062	1.87472	1.86172	1.84105	1.8121	1.77128	1.72012	1.6574	1.5849	1.50077	1.40948	1.3129	1.21667	1.1214		Loss Modulus (kPa)	0.347283	0.349137	0.351302	0.353368	0.354942	0.35676	0.359128	0.361385	0.363028	0.364965	0.366463	0.36763	0.3688	0.36943	0.369585	0.369003	0.367355	0.364545	0.360422	0.354592	0.346855
Brain	Storage Modulus (kPa)	0.15989	0.161447	0.16112	0.161297	0.16183	0.16223	0.162733	0.163135	0.16371	0.164255	0.164593	0.16474	0.165165	0.165265	0.165197	0.164928	0.164322	0.163388	0.161843	0.15946	0.155833	0.150733	0.14397	0.133665	0.120063		Loss Modulus (kPa)	0.0506455	0.050319	0.0502703	0.0504138	0.0504068	0.0505608	0.0505222	0.0506725	0.0508005	0.0508595	0.0509245	0.0510103	0.0510485	0.0510987	0.0511637	0.0512055	0.0512107	0.0511938	0.0511092	0.0509533	0.0506855
Kidney	Storage Modulus (kPa)	0.484934	0.487838	0.49094	0.49041	0.489952	0.49012	0.489446	0.48909	0.489062	0.48838	0.487666	0.486294	0.48462	0.482462	0.479312	0.4751	0.469736	0.462822	0.454122	0.443252	0.430382	0.415426	0.398536	0.38134	0.364896		Loss Modulus (kPa)	0.118448	0.121776	0.117112	0.116598	0.117438	0.115676	0.11603	0.116116	0.114862	0.11483	0.114668	0.114334	0.114094	0.114196	0.113854	0.113744	0.113562	0.113382	0.11309	0.112662	0.112057
Liver	Storage Modulus (kPa)	0.276685	0.282822	0.286178	0.288165	0.290365	0.29163	0.292343	0.293048	0.293162	0.292835	0.292417	0.291595	0.289835	0.28754	0.284303	0.2801	0.274807	0.268388	0.260703	0.251775	0.241382	0.230047	0.21841	0.205902	0.193812		Loss Modulus (kPa)	0.080966	0.0799632	0.080849	0.0804472	0.0805053	0.080531	0.0805665	0.0808907	0.081006	0.0811705	0.0812472	0.0811622	0.081167	0.0810457	0.080851	0.0805147	0.080012	0.0793007	0.0783162	0.0770238	0.075371
[truncated: 4 more columns]

## Sheet: SFKV model prediction
Coefficient of consistence
		Axial Strain kidney (%)	13.3	15.3	17.3	19.3	21.3	23.3
		Axial Strain liver (%)	22.2	24.2	26.2	28.2	30.2	32.2
		Axial Strain brain (%)	33.3	35.3	37.3	39.3	41.3	43.3
		Axial Strain heart (%)	3.5	5.5	7.5	9.5	11.5	13.5
		Heart	1.9863	2.3798	2.7477	3.0991	3.4994	3.9372
		Kidney	0.8799	1.07	1.3	1.6	1.97	2.457
		Liver	0.2743	0.3402	0.4084	0.4693	0.5321	0.587
		Brain	0.2499	0.2681	0.28678	0.30468	0.3222	0.34215
Semi-Fractional Kelvin Voight Model efficacy			Time (s)	1	2	3	4	5	6	7	8	9	10
		Heart experimental relaxation		2.46882	2.1865	2.0491	1.96125	1.89987	1.8519	1.81113	1.77828	1.75127	1.72673
	Heart	Theoretical relaxation		1.81802	1.66333	1.57901	1.52179	1.47884	1.44465	1.41636	1.3923	1.37142	1.35301
		Kidney experimental relaxation		0.448497	0.39607	0.36996	0.355537	0.343337	0.332197	0.325463	0.318957	0.313587	0.310367
	Kidney	Theoretical relaxation		0.550755	0.496219	0.466857	0.447084	0.432325	0.420629	0.410987	0.402813	0.395739	0.389516
		Liver experimental relaxation		0.31008	0.274863	0.25705	0.246122	0.2365	0.22893	0.22283	0.21764	0.213702	0.20945
	Liver	Theoretical relaxation		0.244484	0.218834	0.205096	0.195876	0.18901	0.183579	0.179109	0.175326	0.172055	0.16918
		Brain experimental relaxation		0.137602	0.120818	0.112435	0.106596	0.104018	0.101361	0.0996835	0.0965668	0.0949467	0.0933013
	Brain	Theoretical relaxation		0.153204	0.136373	0.127398	0.12139	0.116926	0.113401	0.110504	0.108054	0.105938	0.104081

## Sheet: Shear Modulus at 20 and 37 deg
	Thickness (mm)			Shear Modulus at 20 degrees (kPa)	Shear Modulus at 37 degrees (kPa)
	6.46612			0.58312	0.51952
	4.61596			0.42197	0.40315
	5.18524			0.59805	0.62101
	4.98599			0.27119	0.298
	5.65964			0.55042	0.49756
	5.28012			0.49226	0.44088
	4.40722			0.39446	0.36587
	6.13404			0.53454	0.4632
	6.98796			0.60421	0.54115
	5.56476			0.82464	0.67902
	5.18524			0.52758	0.46089
	4.71084			0.44821	0.42741
	5.375			0.48367	0.46638
	5.94428			0.49909	0.4852
	6.3238			0.53328	0.48754
Avg	5.52175		Avg	0.517779	0.477119
SD	0.73547		SD	0.121369	0.090276
				% Change in Shear Modulus (kPa)	7.85289

## Sheet: Uniaxial compression
	Strain	Stress (kPa)
	0	0.884417
	0.000256893	0.894421
	0.000513002	0.905419
	0.000764036	0.915395
	0.00102754	0.927277
	0.00128379	0.938798
	0.00154018	0.948542
	0.00179231	0.959024
	0.00205282	0.970578
	0.00230406	0.98167
	0.00254582	0.991782
	0.00278835	1.0028
	0.00304271	1.01303
	0.00329739	1.02475
	0.00354549	1.0342
	0.00379163	1.04418
	0.00404443	1.05591
	0.00430054	1.06571
	0.00455645	1.0775
	0.00481014	1.08816
	0.00506371	1.09876
	0.00531964	1.1088
	0.00555795	1.11905
	0.00580219	1.13026
	0.00604582	1.13979
	0.00630222	1.15229
	0.00655979	1.16235
	0.00680544	1.173
	0.00705636	1.18311
	0.00730774	1.194
	0.00756288	1.20401
	0.00781927	1.2165
	0.00807154	1.22464
	0.00832623	1.23739
	0.00857887	1.24798
	0.00882079	1.25595
	0.00906535	1.26724
	0.00931624	1.27912
	0.00957142	1.28859
	0.009831	1.3001
	0.0100727	1.31085
	0.0103244	1.32039
	0.0105728	1.32953
	0.01083	1.34444
	0.0110818	1.35356
	0.0113327	1.36504
	0.0115905	1.3756
	0.0118408	1.38637
	0.0120794	1.39693
	0.0123211	1.40864
	0.0125811	1.41826
	0.0128389	1.43119
	0.0130806	1.4415
	0.0133293	1.45207
	0.0135794	1.46267
	0.0138344	1.47436
	0.0140921	1.48509
	0.0143443	1.49871
	0.0145995	1.51109
	0.0148537	1.5225
	0.0150995	1.53077
	0.0153398	1.54117
	0.0155902	1.55378
	0.01584	1.56503
	0.0160995	1.57804
	0.0163493	1.58657
	0.0166003	1.59887
	0.0168481	1.61136
	0.017111	1.6232
	0.0173625	1.63608
	0.0176107	1.64756
	0.017865	1.65935
	0.0181059	1.67102
	0.0183562	1.68102
	0.0185991	1.69216
	0.0188583	1.70461
	0.01911	1.71698
	0.0193585	1.72876
	0.0196079	1.7404
	0.0198592	1.75309
	0.0201107	1.76534

## Sheet: Inertia
This is the data which I have handpicked from our raw data
	Brain Raw Data							Heat Raw Data							Liver Raw Data							Kidney Raw Data
Frequency (Hz)	Angular Frequency	Storage Modulus	Loss Modulus	% drop in storage modulus	% increase in loss modulus		Frequency	Angular Frequency	Storage Modulus	Loss Modulus	% drop in storage modulus	% increase in loss modulus		Frequency	Angular Frequency	Storage Modulus	Loss Modulus	% drop in storage modulus	% increase in loss modulus		Frequency	Angular Frequency	Storage Modulus	Loss Modulus	% drop in storage modulus	% increase in loss modulus
Hz	[rad/s]	[Pa]	[Pa]				Hz	[rad/s]	[Pa]	[Pa]				Hz	[rad/s]	[Pa]	[Pa]				Hz	[rad/s]	[Pa]	[Pa]
0.1	0.628	149.56	40.156				0.1	0.628	1460	296.76				0.1	0.628	149.49	43.001				0.1	0.628	661.41	150.37
0.151433	0.951	156.93	42.659	4.92779	6.23319		0.151433	0.951	1684.6	320.12	15.3836	0.0787168		0.151433	0.951	160.44	42.986	7.3249	-0.0348829		0.151433	0.951	711.52	152.22	7.57624	1.21535
0.229299	1.44	165.74	46.838	5.61397	9.79629		0.229299	1.44	1801.9	327.29	6.96308	0.0223979		0.229299	1.44	171.9	45.987	7.14286	6.98134		0.229299	1.44	757.96	157.64	6.52687	3.43821
0.347134	2.18	176.44	51.84	6.45589	10.6794		0.347134	2.18	1896	343.82	5.22227	0.0505057		0.347134	2.18	184.54	49.964	7.35311	8.6481		0.347134	2.18	802.73	166.38	5.90664	5.25304
0.525478	3.3	188.8	58.075	7.00521	12.0274		0.525478	3.3	1989.3	364.13	4.92089	0.0590716		0.525478	3.3	197.85	55.094	7.21253	10.2674		0.525478	3.3	847.62	177.71	5.59217	6.37556
0.794586	4.99	202.69	65.484	7.35699	12.7576		0.794586	4.99	2085.9	388.12	4.85598	0.0658831		0.794586	4.99	211.92	61.559	7.11145	11.7345		0.794586	4.99	893.35	191.71	5.39511	7.3027
1.20223	7.55	217.31	74.777	7.21299	14.1913		1.20223	7.55	2186.8	416.38	4.83724	0.0728125		1.20223	7.55	226.64	69.436	6.94602	12.7959		1.20223	7.55	941.05	209.01	5.33945	8.27712
1.81529	11.4	232.32	86.17	6.90718	15.236		1.81529	11.4	2294.1	450.22	4.90671	0.0812719		1.81529	11.4	241.7	79.753	6.6449	14.8583		1.81529	11.4	988.54	229.79	5.04649	9.04304
2.75478	17.3	246.3	100.72	6.01756	16.8852		2.75478	17.3	2395.9	490.31	4.43747	0.0890454		2.75478	17.3	256.14	92.072	5.97435	15.4464		2.75478	17.3	1032.3	254.94	4.42673	9.86507
4.17197	26.2	254.78	119.5	3.44296	18.6458		4.17197	26.2	2493.2	538.38	4.0611	0.09804		4.17197	26.2	265.76	108.07	3.75576	17.3755		4.17197	26.2	1061.8	285.41	2.8577	10.6759
6.30573	39.6	284.71	142.14	11.7474	18.9456		6.30573	39.6	2594.5	589.74	4.06305	0.0953973		6.30573	39.6	298.06	125.08	12.1538	15.7398		6.30573	39.6	1084	318.65	2.09079	10.4315
9.53822	59.9	276.44	172.16	-2.90471	21.12		9.53822	59.9	2623.8	655.52	1.12931	0.111541		9.53822	59.9	290.98	148.73	-2.37536	18.9079		9.53822	59.9	1013.9	361.66	-6.46679	11.8924
							14.4268	90.6	2496.9	724.14	-4.8365	0.10468									14.4268	90.6	754.15	413.58	-25.6189	12.5538
							21.8153	137	1982.4	793.06	-20.6056	0.095175									21.8153	137	34.196	475.41	-95.4656	13.0056
																					33.121	208	0.095136	1902.7	-99.7218	75.0139
Our kidney data															Threshold values
		Frequency (Hz)		0.1	0.151433	0.229299	0.347134	0.525478	0.794586	1.20223	1.81529	2.75478	4.17197	6.30573	9.53822	14.4268	21.8153	33.121
																6% drop	26% drop	30% drop
	Storage Modulus (kPa)	0.5% strain or 0.1 N		0.643738	0.685598	0.722732	0.762866	0.800914	0.840172	0.881946	0.925894	0.971758	1.01818	1.09061	1.15116	1.08209	0.80075	0.560525
																12% increase	13% increase	32% increase
	Loss Modulus (kPa)	0.5% strain or 0.1 N		0.127626	0.129205	0.134366	0.140408	0.149272	0.160446	0.17404	0.190436	0.21031	0.234312	0.259784	0.292862	0.328005	0.370646	0.489253
Our heart data														Threshold value
		Frequency (Hz)	0.1	0.151433	0.229299	0.347134	0.525478	0.794586	1.20223	1.81529	2.75478	4.17197	6.30573	9.53822	14.4268	21.8153	33.121
															1% drop	4% drop	21% drop
	Storage Modulus (kPa)	0.5% strain or 0.1 N	1.35118	1.4995	1.61015	1.7168	1.82012	1.9224	2.02585	2.13365	2.24185	2.3486	2.4656	2.53115	2.50584	2.4056	1.90043
															12% increase	15% increase	20% increase
	Loss Modulus (kPa)	0.5% strain or 0.1 N	0.314172	0.313275	0.321487	0.335647	0.353938	0.376082	0.402767	0.43457	0.47288	0.519335	0.568825	0.62981	0.705387	0.811195	0.973434
Our liver data												Threshold value
		Frequency (Hz)	0.1	0.151433	0.229299	0.347134	0.525478	0.794586	1.20223	1.81529	2.75478	4.17197	6.30573	9.53822	14.4268
													2% drop	3% drop	12% drop
	Storage Modulus (kPa)	0.5% strain or 0.1 N	0.180565	0.195508	0.209643	0.22424	0.2397	0.25625	0.274195	0.293413	0.31365	0.332783	0.326127	0.316343	0.278382
													15% increase	17% increase	18% increase
	Loss Modulus (kPa)	0.5% strain or 0.1 N	0.0504088	0.0515615	0.0550337	0.059702	0.0657275	0.0732535	0.0826458	0.0945298	0.108715	0.126947	0.14599	0.170808	0.201553
Our brain data											Threshold vaule
		Frequency (Hz)	0.1	0.151433	0.229299	0.347134	0.525478	0.794586	1.20223	1.81529	2.75478	4.17197	6.30573	9.53822	14.4268
												2% drop	3% drop	6% drop	11% drop
	Storage Modulus (kPa)	0.5% strain or 0.1 N	0.164902	0.179445	0.192983	0.20651	0.220333	0.235093	0.250642	0.266215	0.281087	0.275466	0.267202	0.25117	0.223541
												16% increase	18% increase	19% increase	21% increase
	Loss Modulus (kPa)	0.5% strain or 0.1 N	0.0463985	0.0480897	0.0509435	0.0551762	0.0606303	0.0675277	0.0761467	0.0870383	0.10092	0.117067	0.13814	0.164386	0.198907
